# Supplementary material for: Framework and coordination strain in two isostructural hybrid metal–organic perovskites
Source: Royal Society of Chemistry journal article supplement (doi:10.1039/c8ce00884a), 2018-01-01
Supplement: c8ce00884a1.pdf [file c8ce00884a1.pdf]

# Supporting Information:

## Framework and Coordination Strain in Two Isostructural Hybrid Metal-Organic Perovskites

Szymon Sobczak,<sup>1</sup> Abhishek Chitnis,<sup>2</sup> Michał Andrzejewski,<sup>1†</sup> Mirosław Mączka,<sup>3</sup> Smita Gohil,<sup>4</sup> Nandini Garg,<sup>\*2</sup> Andrzej Katrusiak,<sup>\*1</sup>

<sup>1</sup> Faculty of Chemistry, Adam Mickiewicz University, Umultowska 89b, 61-614 Poznań, Poland

<sup>2</sup> High Pressure Synchrotron Radiation Physics Division, Bhabha Atomic Research Centre, Trombay, Mumbai - 400 085 India

<sup>2</sup> Institute of low temperature and structure research, Polish Academy of Sciences, P.O. Box 1410, 50-950, Poland

<sup>4</sup> Dept. Of Condensed Matter Physics and Materials Science Tata institute of fundamental research, Colaba, Mumbai – 400005

† Present Address: Universität Bern Departement für Chemie und Biochemie, Freiestrasse 3, 3012 Bern, Switzerland.

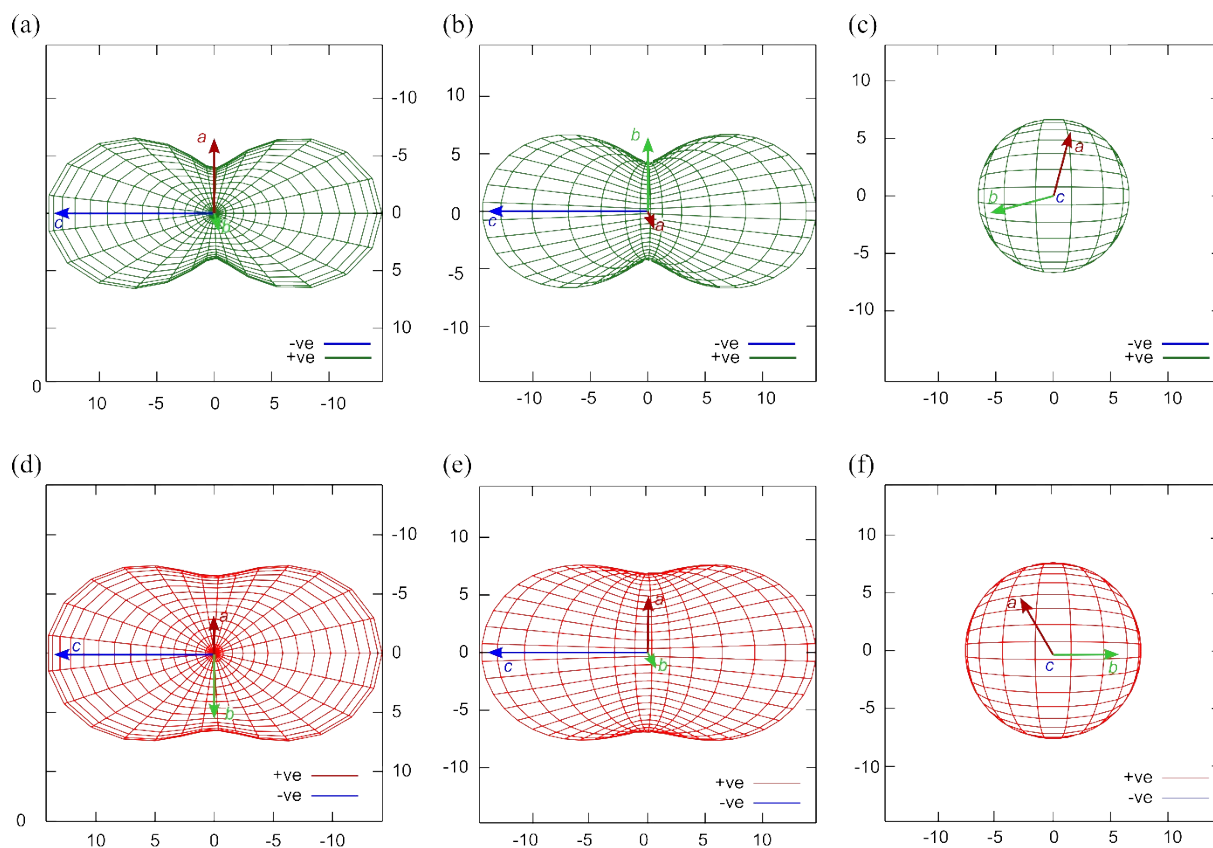

**Figure S1.** Calculated compressibility (in  $\text{TPa}^{-1}$ ) indicatrices of the formate crystals viewed along the (a) [100] (b) [010] and (c) [010] directions in: (a-c)  $\text{DmaNiFor}_3$ ; and (d-f)  $\text{DmaCoFor}_3$ .

**Table S1.** Compressibility related to crystallographic axes calculated for  $\text{DmaNiFor}_3$

| Axes  | K( $\text{TPa}^{-1}$ ) | $\sigma\text{K}(\text{TPa}^{-1})$ | Direction |         |   | Empirical parameters |           |         |        |
|-------|------------------------|-----------------------------------|-----------|---------|---|----------------------|-----------|---------|--------|
|       |                        |                                   | a         | b       | c | $\epsilon_0$         | $\lambda$ | $P_c$   | $\nu$  |
| $X_1$ | 14.6549                | 3.8197                            | 0         | 0       | 1 | -1.36E-03            | -8.99E-03 | 0.001   | 1.2582 |
| $X_2$ | 3.9281                 | 1.5571                            | -0.966    | -0.2586 | 0 | -5.16E-04            | -8.61E-03 | 0.001   | 0.6492 |
| $X_3$ | 4.3124                 | 1.7758                            | 0.259     | 0.9659  | 0 | 6.03E-01             | -5.91E-01 | -1.7234 | 0.031  |
| V     | 23.3374                | 0.4845                            |           |         |   |                      |           |         |        |

#### Birch-Murnaghan Coefficients

|                       | $B_0$ (GPa) | $\sigma B_0$ (GPa) | $V_0$ ( $\text{\AA}^3$ ) | $\sigma V_0$ ( $\text{\AA}^3$ ) | $B'$   | $\sigma B'$ | $P_c$ (GPa) |
|-----------------------|-------------|--------------------|--------------------------|---------------------------------|--------|-------------|-------------|
| <b>2<sup>nd</sup></b> | 34.6697     | 1.0105             | 1257.588                 | 1.9358                          | 4      | n/a         | 0           |
| <b>3<sup>rd</sup></b> | 35.1937     | 3.8009             | 1257.343                 | 2.6754                          | 3.6756 | 2.232       | 0           |

**Table S2.** Compressibility related to crystallographic axes calculated for DmaCoFor<sub>3</sub>

| Axes           | Direction             |                                |         | Empirical parameters |   |              |           |          |        |
|----------------|-----------------------|--------------------------------|---------|----------------------|---|--------------|-----------|----------|--------|
|                | K(TPa <sup>-1</sup> ) | $\sigma$ K(TPa <sup>-1</sup> ) | a       | b                    | c | $\epsilon_0$ | $\lambda$ | $P_c$    | $\nu$  |
| X <sub>1</sub> | 14.2155               | 2.0865                         | 0       | 0                    | 1 | 8.76E-02     | -2.37E-03 | -10.1784 | 1.5619 |
| X <sub>2</sub> | 6.53                  | 0.5194                         | -0.0049 | 1                    | 0 | -4.70E-04    | -8.08E-03 | 0.001    | 0.7726 |
| X <sub>3</sub> | 6.9044                | 0.2513                         | 0.8931  | 0.4498               | 0 | -1.01E-04    | -8.27E-03 | 0.001    | 0.803  |
| V              | 27.2583               | 0.9877                         |         |                      |   |              |           |          |        |

## Birch-Murnaghan Coefficients

|                 | $B_0$ (GPa) | $\sigma B_0$ (GPa) | $V_0$ (Å <sup>3</sup> ) | $\sigma V_0$ (Å <sup>3</sup> ) | $B'$   | $\sigma B'$ | $P_c$ (GPa) |
|-----------------|-------------|--------------------|-------------------------|--------------------------------|--------|-------------|-------------|
| 2 <sup>nd</sup> | 30.1052     | 1.2672             | 1294.028                | 1.9115                         | 4      | n/a         | 0           |
| 3 <sup>rd</sup> | 32.3328     | 5.1252             | 1293.149                | 2.6669                         | 2.1634 | 3.8814      | 0           |

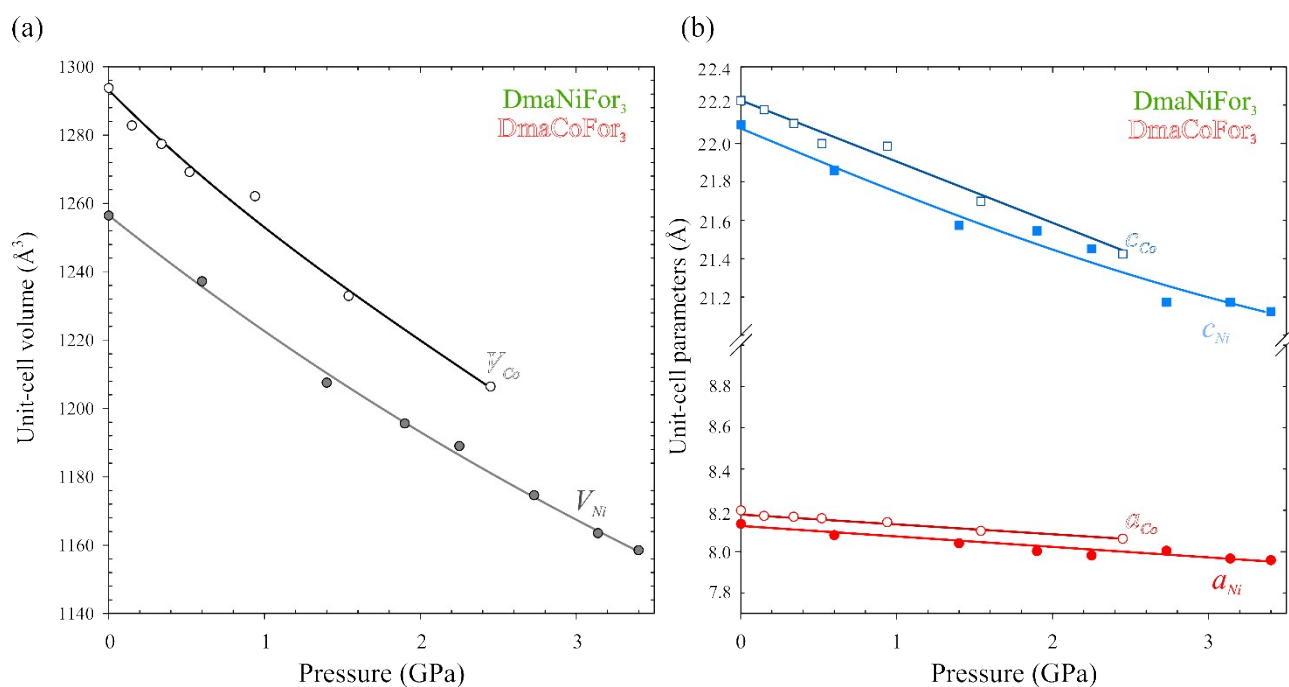**Figure S2.** Comparison of the unit-cell dimensions of DmaCoFor<sub>3</sub> (open symbols) and DmaNiFor<sub>3</sub> (full symbols) as a function of pressure.

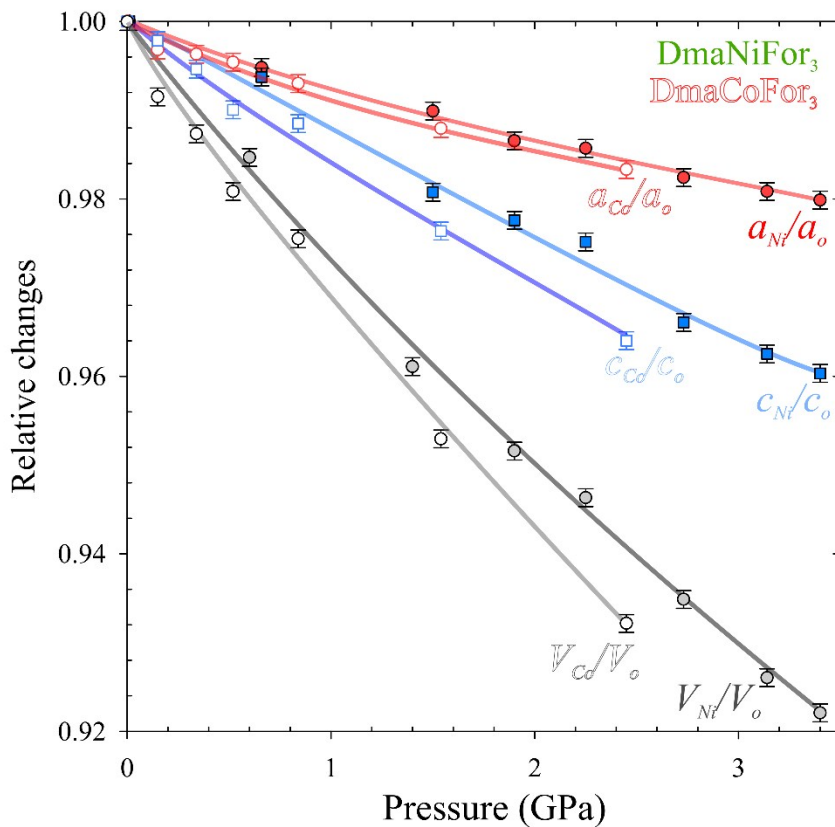

**Figure S3.** Comparison of relative changes with increasing pressure of parameters  $a$ ,  $c$  and  $V$  for DmaCoFor<sub>3</sub> (open symbols) and DmaNiFor<sub>3</sub> (full symbols).

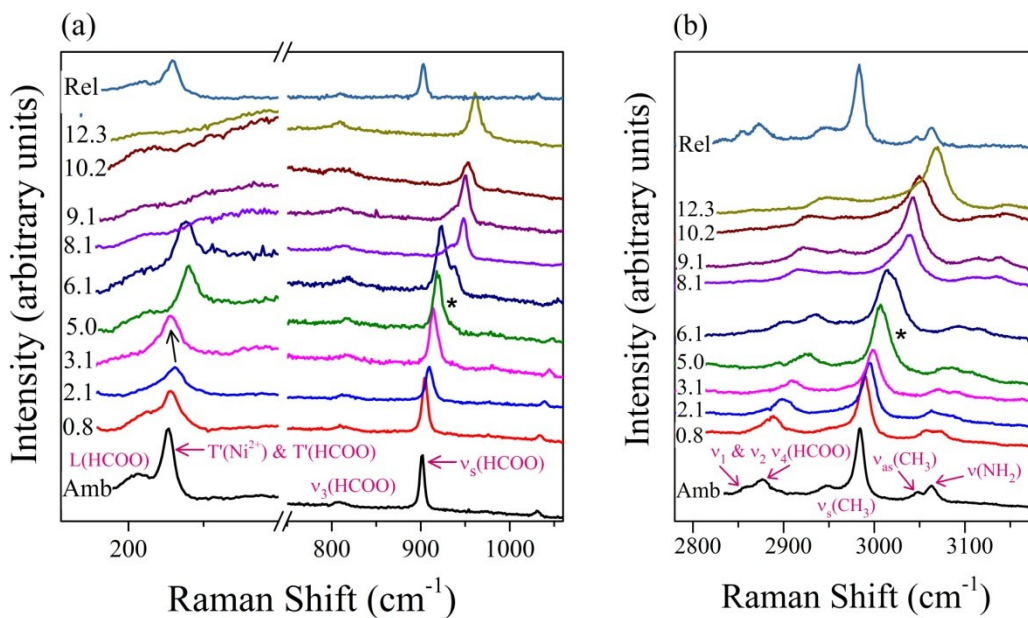

**Figure S4.** Pressure-dependent Raman spectra of DmaNiFor<sub>3</sub> ranging from (a) 170 to 1050 cm<sup>-1</sup>; and (b) 2800 to 3180 cm<sup>-1</sup>. The asterisk marks the appearance of a new peak. The arrow shows the softening of mode. All pressure values written against spectra are in GPa. ‘Rel’ stands for ‘released’ pressure and collected at ambient conditions.

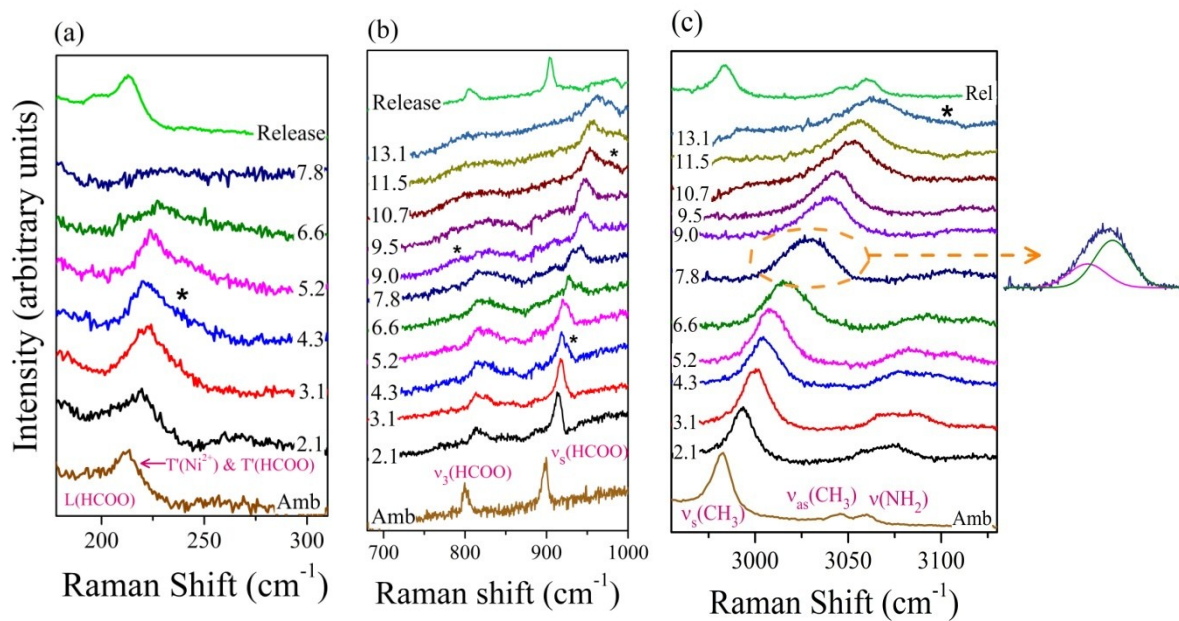

**Figure S5.** Pressure dependent Raman spectra of DmaCoFor<sub>3</sub> ranging from (a) 170 to 300 cm<sup>-1</sup>; (b) 700 to 1000 cm<sup>-1</sup>; (c) 2960 to 3120 cm<sup>-1</sup>. The asterisk marks the appearance of a new peak. All pressure values written against spectra are in GPa.

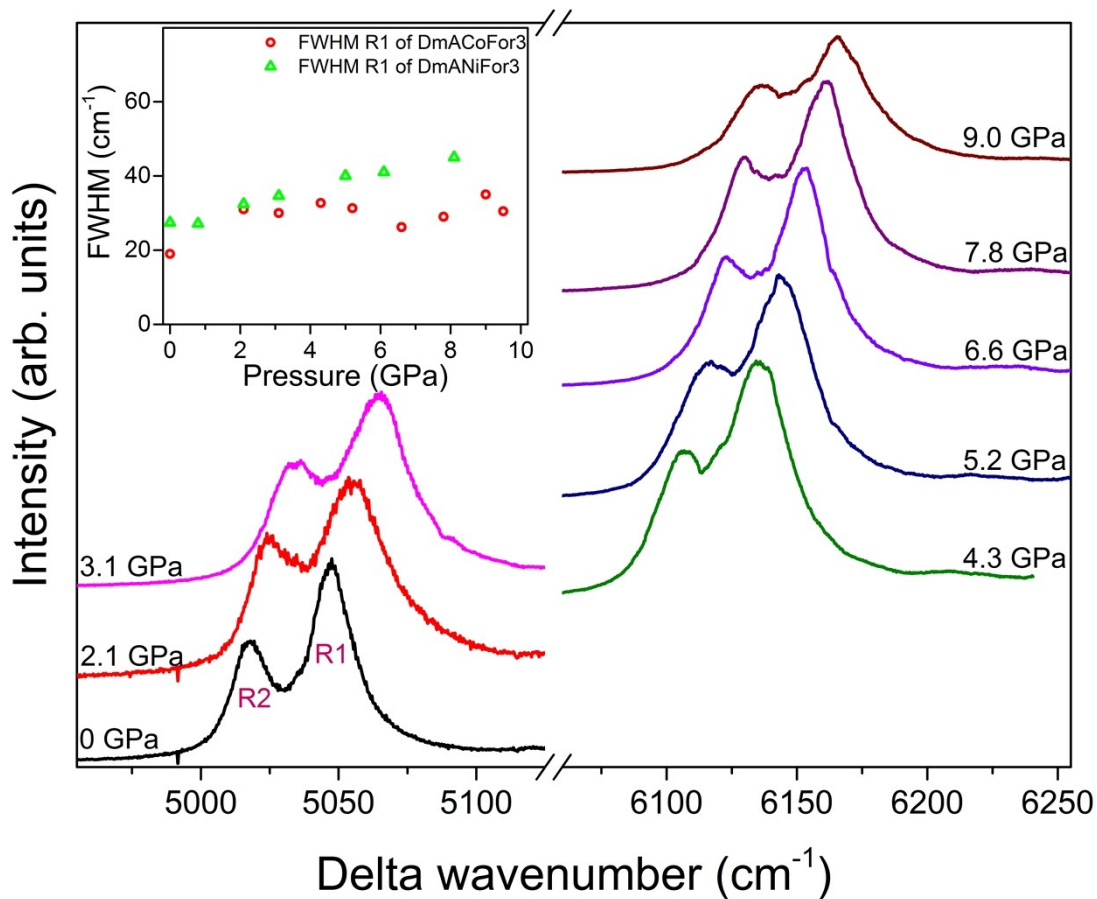

**Figure S6.** The ruby R1 and R2 line as a function of pressure during high-pressure Raman studies. The FWHM of the ruby peak does not change much with increasing pressure, indicating that the environment is quasi hydrostatic. The first three pressures were measured with the 514 nm and the rest of the pressures were measured with the 488 nm laser wavelength.

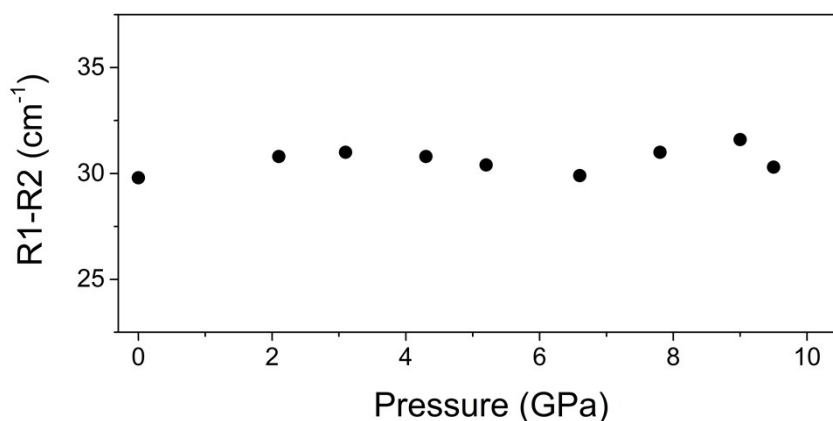

**Figure S7.** Splitting of the R1 and R2 ruby fluorescence lines with increasing pressure during high-pressure Raman studies.

|                                                                                           |                        |                      |                      |                       |                      |                      |                      |                      |             |
|-------------------------------------------------------------------------------------------|------------------------|----------------------|----------------------|-----------------------|----------------------|----------------------|----------------------|----------------------|-------------|
| Pressure                                                                                  | 0.1MPa                 | 0.60GPa              | 1.40GPa              | 1.90 GPa              | 2.25 GPa             | 2.73 GPa             | 3.14 GPa             | 3.34 GPa             |             |
| Formula weight                                                                            | 245.90                 | 245.90               | 245.90               | 245.90                | 245.90               | 245.90               | 245.90               | 737.66               |             |
| Wavelength (Å)                                                                            | 0.71073                | 0.71073              | 0.71073              | 0.71073               | 0.71073              | 0.71073              | 0.71073              | 0.71073              |             |
| Crystal system                                                                            | trigonal               | trigonal             | trigonal             | trigonal              | trigonal             | trigonal             | triclinic            | triclinic            |             |
| Space group                                                                               | <i>R</i> -3 <i>c</i>   | <i>R</i> -3 <i>c</i> | <i>R</i> -3 <i>c</i> | <i>R</i> -3 <i>c</i>  | <i>R</i> -3 <i>c</i> | <i>R</i> -3 <i>c</i> | <i>R</i> -3 <i>c</i> | <i>R</i> -3 <i>c</i> |             |
| Unit cell dimensions                                                                      | <i>a</i> (Å)           | 8.12139(16)          | 8.0690(17)           | 8.0395(4)             | 8.0016(16)           | 7.981(13)            | 8.0039(15)           | 7.9659(6)            | 7.9580(6)   |
|                                                                                           | <i>b</i> (Å)           | 8.12139(16)          | 8.0690(17)           | 8.0395(4)             | 8.0016(16)           | 7.9955(13)           | 8.0039(15)           | 7.9659(6)            | 7.9580(6)   |
|                                                                                           | <i>c</i> (Å)           | 21.9961(4)           | 21.941(7)            | 21.5732(14)           | 21.563(6)            | 21.55(3)             | 21.172(5)            | 21.141(3)            | 21.1236(17) |
|                                                                                           | $\alpha$ (°)           | 90                   | 90                   | 90                    | 90                   | 90                   | 90                   | 90                   | 90          |
|                                                                                           | $\beta$ (°)            | 90                   | 90                   | 90                    | 90                   | 90                   | 90                   | 90                   | 90          |
|                                                                                           | $\gamma$ (°)           | 120                  | 120                  | 120                   | 120                  | 120                  | 120                  | 120                  | 120         |
| Volume (Å <sup>3</sup> )                                                                  | 1256.43(6)             | 1237.2(6)            | 1207.55(14)          | 1195.6(6)             | 1189.0(19)           | 1174.6(5)            | 1161.8(2)            | 1158.52(15)          |             |
| <i>Z</i> / <i>Z'</i>                                                                      | 6/0.16667              | 6/0.16667            | 6/0.16667            | 6/0.16667             | 6/0.16667            | 6/0.16667            | 6/0.16667            | 6/0.16667            |             |
| Molecular volume ( <i>V</i> / <i>Z</i> )                                                  | 209.405                | 206.2                | 201.2583             | 199.2667              | 198.1667             | 195.7667             | 193.6333             | 193.0867             |             |
| Calculated density (g/cm <sup>3</sup> )                                                   | 1.950                  | 1.966                | 2.012                | 2.032                 | 2.044                | 2.069                | 2.088                | 2.097                |             |
| Absorption (mm <sup>-1</sup> )                                                            | 2.317                  | 2.356                | 2.411                | 2.435                 | 2.448                | 2.478                | 2.502                | 2.513                |             |
| F(000)                                                                                    | 780.0                  | 768.0                | 768.0                | 768.0                 | 768.0                | 768.0                | 768.0                | 768.0                |             |
| Crystal size (mm)                                                                         | 0.209×0.231×0.20       | 0.209×0.231×0.20     | 0.204×0.196×0.20     | 0.202×0.1966×0.20     | 0.202×0.195×0.20     | 0.20×0.20×0.195      | 0.197×0.197×0.195    | 0.196×0.196×0.195    |             |
| 2 $\theta$ -range for data collection (°)                                                 | 9.41 to 56.716         | 10.094 to 57.046     | 11.626 to 56.022     | 10.192 to 57.148      | 9.594 to 56.482      | 11.718 to 56.402     | 10.238 to 55.666     | 11.776 to 57.112     |             |
| Min/max indices: h, k, l                                                                  | -10/10, -10/10, -28/28 | -9/9, -7/7, -22/22   | -9/9, -6/6, -22/22   | -10/-9, -10/10, 22/20 | -10/10, -9/9, -11/11 | -10/10, -7/7, -23/24 | -7/7, -10/10, -23/24 | -10/10, -7/7, -23/24 |             |
| Reflect. Collected/unique                                                                 | 10214/348              | 1981/226             | 1956/216             | 2305/243              | 1892/211             | 2117/230             | 1825/154             | 2143/178             |             |
| <i>R</i> <sub>int</sub>                                                                   | 0.0985                 | 0.0441               | 0.0972               | 0.0983                | 0.0282               | 0.1359               | 0.0363               | 0.0861               |             |
| Refinement method;                                                                        | least-squares          | least-squares        | least-squares        | least-squares         | least-squares        | least-squares        | least-squares        | least-squares        |             |
| Completeness (%)                                                                          | 100                    | 63.84                | 66.26                | 71.97                 | 62.20                | 71.30                | 53.29                | 53.29                |             |
| Data/restraints/parameters                                                                | 348/4/37               | 225/0/35             | 216/0/36             | 243/0/36              | 1892/0/28            | 231/0/36             | 158/0/36             | 178/0/36             |             |
| Goodness-of-fit on F <sup>2</sup>                                                         | 1.122                  | 0.861                | 1.131                | 1.163                 | 1.110                | 1.206                | 1.135                | 1.191                |             |
| Final <i>R</i> <sub>1</sub> / <i>wR</i> <sub>2</sub> ( <i>I</i> >2 $\sigma$ ( <i>I</i> )) | 0.0277/ 0.0693         | 0.0263/0.0869        | 0.0269/0.0689        | 0.0391/0.0865         | 0.0196/0.0471        | 0.0469/0.1139        | 0.0181/0.0450        | 0.0280/0.0627        |             |
| <i>R</i> <sub>1</sub> / <i>wR</i> <sub>2</sub> (all data)                                 | 0.0288/ 0.0707         | 0.0284/0.0892        | 0.0286/0.0696        | 0.0436/0.0926         | 0.0211/0.0477        | 0.0521/0.1204        | 0.0195/0.0453        | 0.0310/0.0643        |             |
| Largest diff. peak/hole (e.Å <sup>-3</sup> )                                              | 0.71/-0.41             | 0.35/-0.32           | 0.31/-0.35           | 0.46/-0.69            | 0.30/-0.17           | 0.79/-0.47           | 0.34/-0.13           | 0.23/-0.28           |             |

**Table S3.** Crystallographic data of **DmaNiFor<sub>3</sub>**

**Table S4.** Crystallographic data of **DmaCoFor<sub>3</sub>**



| Pressure                                     | 0.15 GPa     | 0.34GPa              | 0.52GPa            | 0.82GPa            | 1.54 GPa            | 2.45 GPa           |                    |
|----------------------------------------------|--------------|----------------------|--------------------|--------------------|---------------------|--------------------|--------------------|
| Formula weight                               | 779.44       | 779.44               | 779.44             | 779.44             | 779.44              | 779.44             |                    |
| Wavelength (Å)                               | 0.71073      | 0.71073              | 0.71073            | 0.71073            | 0.71073             | 0.71073            |                    |
| Crystal system                               | trigonal     | trigonal             | trigonal           | trigonal           | trigonal            | trigonal           |                    |
| Space group                                  | <i>R-3c</i>  | <i>R-3c</i>          | <i>R-3c</i>        | <i>R-3c</i>        | <i>R-3c</i>         | <i>R-3c</i>        |                    |
| Unit cell dimensions                         | <i>a</i> (Å) | 8.1727(8)            | 8.1686(14)         | 8.161(5)           | 8.142(3)            | 8.1000(12)         | 8.0621(10)         |
|                                              | <i>b</i> (Å) | 8.1727(8)            | 8.1686(14)         | 8.161(5)           | 8.142(3)            | 8.1000(12)         | 8.0621(10)         |
|                                              | <i>c</i> (Å) | 22.176(4)            | 22.105(5)          | 22.00(2)           | 21.986(14)          | 21.699(6)          | 21.424(6)          |
|                                              | $\alpha$ (°) | 90                   | 90                 | 90                 | 90                  | 90                 | 90                 |
|                                              | $\beta$ (°)  | 90                   | 90                 | 90                 | 90                  | 90                 | 90                 |
|                                              | $\gamma$ (°) | 120                  | 120                | 120                | 120                 | 120                | 120                |
| Volume (Å <sup>3</sup> )                     |              | 1282.8(3)            | 1277.4(4)          | 1269(2)            | 1262.1(12)          | 1232.9(5)          | 1206.0(4)          |
| <i>Z</i> / <i>Z'</i>                         |              | 6/0.16667            | 6/0.16667          | 6/0.16667          | 6/0.16667           | 6/0.16667          | 6/0.16667          |
| Molecular volume (V/ <i>Z</i> )              |              | 213.8                | 212.9              | 211.5              | 210.35              | 205.4833333        | 201                |
| Calculated density (g/cm <sup>3</sup> )      |              | 1.873                | 1.904              | 1.916              | 1.903               | 1.973              | 2.017              |
| Absorption (mm <sup>-1</sup> )               |              | 2.006                | 2.016              | 2.029              | 2.039               | 2.088              | 2.135              |
| F(000)                                       |              | 699.0                | 699.0              | 699.0              | 699.0               | 699.0              | 699.0              |
| Crystal size (mm)                            |              | 0.2 x 0.2 x 0.1      | 0.2 x 0.2 x 0.1    | 0.2 x 0.2 x 0.1    | 0.2 x 0.2 x 0.1     | 0.2 x 0.2 x 0.1    | 0.2 x 0.2 x 0.1    |
| 2 $\theta$ -range for data collection (°)    |              | 9.978 to 52.554      | 9.982 to 52.892    | 9.992 to 52.27     | 10.016 to 52.914    | 10.068 to 51.944   | 10.116 to 52.436   |
| Min/max indices: h, k, l                     |              | -10/10, -8/8, -22/22 | -9/9, -5/5, -26/25 | -5/5, -8/9, -26/25 | -8/8, -10/9, -22/23 | -7/7, -8/8, -22/22 | -7/7, -8/8, -22/22 |
| Reflect. Collected/unique                    |              | 1817/194             | 1858/236           | 1176/222           | 1980/196            | 1942/188           | 1917/187           |
| R <sub>int</sub>                             |              | 0.0593               | 0.0852             | 0.1205             | 0.1182              | 0.1383             | 0.1371             |
| Refinement method;                           |              | least-squares        | least-squares      | least-squares      | least-squares       | least-squares      | least-squares      |
| Completeness (%)                             |              | 66.4                 | 66.4               | 77.46              | 66.9                | 68.7               | 68.0               |
| Data/restraints/parameters                   |              | 194/0/35             | 236/0/33           | 222/0/33           | 196/0/31            | 188/0/34           | 187/0/33           |
| Goodness-of-fit on F <sup>2</sup>            |              | 1.198                | 1.089              | 1.155              | 1.059               | 1.156              | 1.130              |
| Final R1/wR2 (I>2 $\sigma$ (I))              |              | 0.0376/ 0.0692       | 0.0504/ 0.1173     | 0.0777/ 0.1502     | 0.0407/0.0794       | 0.0462/0.0718      | 0.0491/ 0.0611     |
| R1/wR2 (all data)                            |              | 0.0631/ 0.0788       | 0.0767/ 0.1364     | 0.1407/ 0.1887     | 0.0797/0.0907       | 0.1024/0.0901      | 0.0965/ 0.0714     |
| Largest diff. peak/hole (e.Å <sup>-3</sup> ) |              | 0.36/-0.32           | 0.58/-0.52         | 0.56/-0.66         | 0.38/-0.40          | 0.42/-0.48         | 0.38 / -0.32       |
